# Supplementary material for: Pregnancy Weight Gain and Childhood Body Weight: A Within-Family Comparison
Source: PLoS Med. 2013 Oct 1;10(10):e1001521. doi: 10.1371/journal.pmed.1001521 (PMC3794857; doi:10.1371/journal.pmed.1001521)
Supplement: Table S1 — Estimates from XTREG fixed effects model of child BMI on maternal weight gain (kg). (DOCX) [file pmed.1001521.s001.docx]

**Table S1: Estimates from XTREG Fixed Effects Model of Child BMI on Maternal Weight Gain (kg)**

|  | **Coef.** | **P>ItI** | **[95% Conf. Interval]** | |
| --- | --- | --- | --- | --- |
| Mother Weight Gain (kg) | 0.022 | 0.000 | 0.013 | 0.031 |
| Mother Age < 20 | 0.986 | 0.036 | 0.063 | 1.909 |
| Mother Age 20-24 | 0.884 | 0.058 | -0.030 | 1.798 |
| Mother Age 25-29 | 0.923 | 0.048 | 0.010 | 1.837 |
| Mother Age 30-34 | 1.000 | 0.034 | 0.074 | 1.925 |
| Mother Age 35+ | 1.165 | 0.018 | 0.202 | 2.129 |
| Mother Married | -0.003 | 0.976 | -0.171 | 0.165 |
| Married Missing | 2.051 | 0.014 | 0.419 | 3.683 |
| Mother Smoked | -0.161 | 0.068 | -0.334 | 0.012 |
| Smoking Missing | -0.369 | 0.332 | -1.115 | 0.377 |
| Child Male | -0.301 | 0.000 | -0.375 | -0.227 |
| Child 1st Born | 0.043 | 0.643 | -0.138 | 0.224 |
| Child 2nd Born | 0.029 | 0.671 | -0.106 | 0.165 |
| Child 4th or Higher Order | 0.083 | 0.610 | -0.236 | 0.401 |
| Gestation = 37 wks | 0.039 | 0.818 | -0.293 | 0.370 |
| Gestation = 38 wks | 0.031 | 0.847 | -0.281 | 0.342 |
| Gestation = 39 wks | 0.027 | 0.862 | -0.278 | 0.332 |
| Gestation = 40 wks | 0.033 | 0.828 | -0.267 | 0.334 |
| Gestation = 41 wks | 0.039 | 0.809 | -0.277 | 0.356 |
| Constant | 17.802 | 0.000 | 16.770 | 18.835 |

Notes: The model in Table S1 also included indicator variables for single month of child age. The omitted category of maternal age is “missing”. The omitted category of parity is 3rd born. The omitted category of gestation is 42 weeks. The P-value refers to the probability that P>|t|.
