# Supplementary material for: Pregnancy Weight Gain and Childhood Body Weight: A Within-Family Comparison
Source: PLoS Med. 2013 Oct 1;10(10):e1001521. doi: 10.1371/journal.pmed.1001521 (PMC3794857; doi:10.1371/journal.pmed.1001521)
Supplement: Table S2 — Fixed effects logit model for probability of child overweight or obese as a function of maternal weight gain during pregnancy (kg). (DOCX) [file pmed.1001521.s002.docx]

**Table S2: Fixed Effects Logit Model for Probability of Child Overweight or Obese as a Function of Maternal Weight Gain During Pregnancy (kg)**

|  | **O.R.** | **P>ItI** | **[95% Conf. Interval]** | |
| --- | --- | --- | --- | --- |
| Mother Weight Gain (kg) | 1.007 | 0.002 | 1.003 | 1.012 |
| Mother Age < 20 | 1.410 | 0.129 | 0.904 | 2.198 |
| Mother Age 20-24 | 1.387 | 0.143 | 0.895 | 2.151 |
| Mother Age 25-29 | 1.418 | 0.120 | 0.913 | 2.201 |
| Mother Age 30-34 | 1.570 | 0.049 | 1.002 | 2.460 |
| Mother Age 35+ | 1.789 | 0.016 | 1.112 | 2.876 |
| Mother Married | 1.005 | 0.905 | 0.922 | 1.096 |
| Married Missing | 0.003 | 0.364 | 0.680 | 2.857 |
| Mother Smoked | 0.948 | 0.255 | 0.864 | 1.039 |
| Smoking Missing | 0.980 | 0.933 | 0.607 | 1.582 |
| Child Male | 1.066 | 0.003 | 1.022 | 1.112 |
| Child 1st Born | 1.054 | 0.661 | 0.834 | 1.331 |
| Child 2nd Born | 1.003 | 0.975 | 0.806 | 1.249 |
| Child 3rd Born | 0.972 | 0.793 | 0.783 | 1.205 |
| Gestation = 37 wks | 1.025 | 0.785 | 0.858 | 1.225 |
| Gestation = 38 wks | 1.021 | 0.811 | 0.864 | 1.205 |
| Gestation = 39 wks | 1.020 | 0.807 | 0.868 | 1.200 |
| Gestation = 40 wks | 0.981 | 0.808 | 0.836 | 1.149 |
| Gestation = 41 wks | 1.033 | 0.705 | 0.872 | 1.240 |

Notes: The model in Table S2 also included indicator variables for single month of child age. The omitted category of maternal age is “missing”. The omitted category of parity is 4th or higher order. The omitted category of gestation is 42 weeks. The P-value refers to the probability that P>z.
